# Supplementary material
Source: Springer Nature journal article supplement (https://www.springermedizin.de/resource/supplementary/12879_2009_1168_MOESM1_ESM.pdf/9442000)
Supplement: MOESM1 [file 9442000]

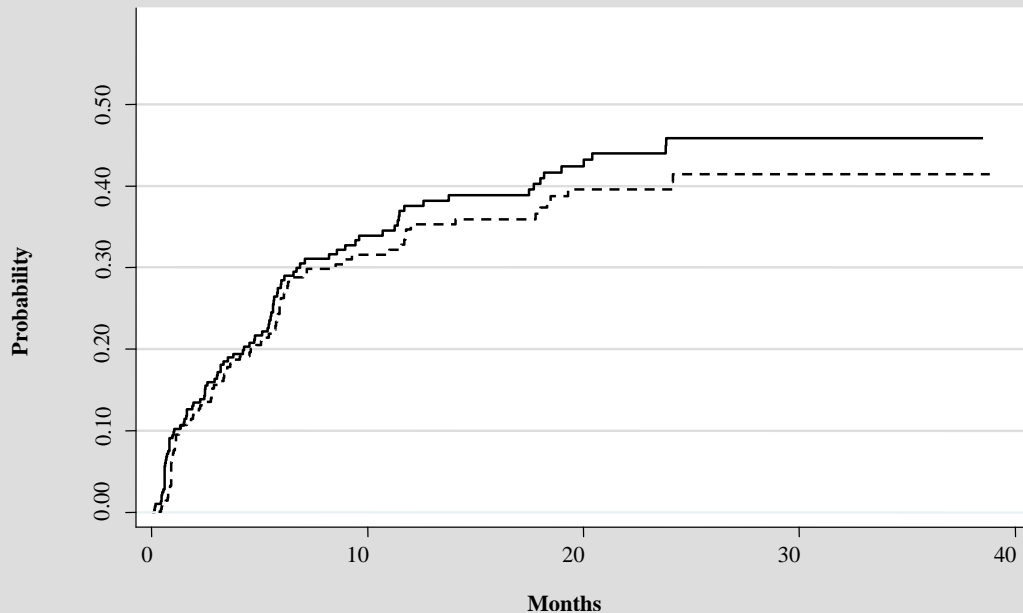

——— Death or severe adverse events (Grade 3/4)  
 - - - - - Severe adverse events (Grade 3/4)

| Time of occurrence of first SAEs        | Month-3          | Month-6          | Month-12         | Month-24         |
|-----------------------------------------|------------------|------------------|------------------|------------------|
| Probability of SAEs occurrence (95% CI) | 16.9 (13.1-21.9) | 24.2 (19.5-29.7) | 29.7 (24.6-35.6) | 33.9 (28.4-40.2) |
| No. of patients at risk                 | 228              | 209              | 161              | 108              |

| Time of occurrence of death or SAEs     | Month-3          | Month-6          | Month-12         | Month-24         |
|-----------------------------------------|------------------|------------------|------------------|------------------|
| Probability of SAEs occurrence (95% CI) | 17.3 (13.4-22.2) | 24.4 (19.8-29.9) | 31.3 (26.1-37.8) | 37.8 (31.1-43.2) |
| No. of patients at risk                 | 226              | 197              | 160              | 99               |

SAEs: severe adverse events  
 CI: confidence interval
